# Supplementary material for: Evolutionary and Biogeographical History of Penguins (Sphenisciformes): Review of the Dispersal Patterns and Adaptations in a Geologic and Paleoecological Context
Source: MDPI journal article supplement (doi:10.3390/d14040255), 2022-03-30
Supplement: s1 [file s1]

# Supplementary Material 1. Paleobiogeographical results of BioGeoBEARS.

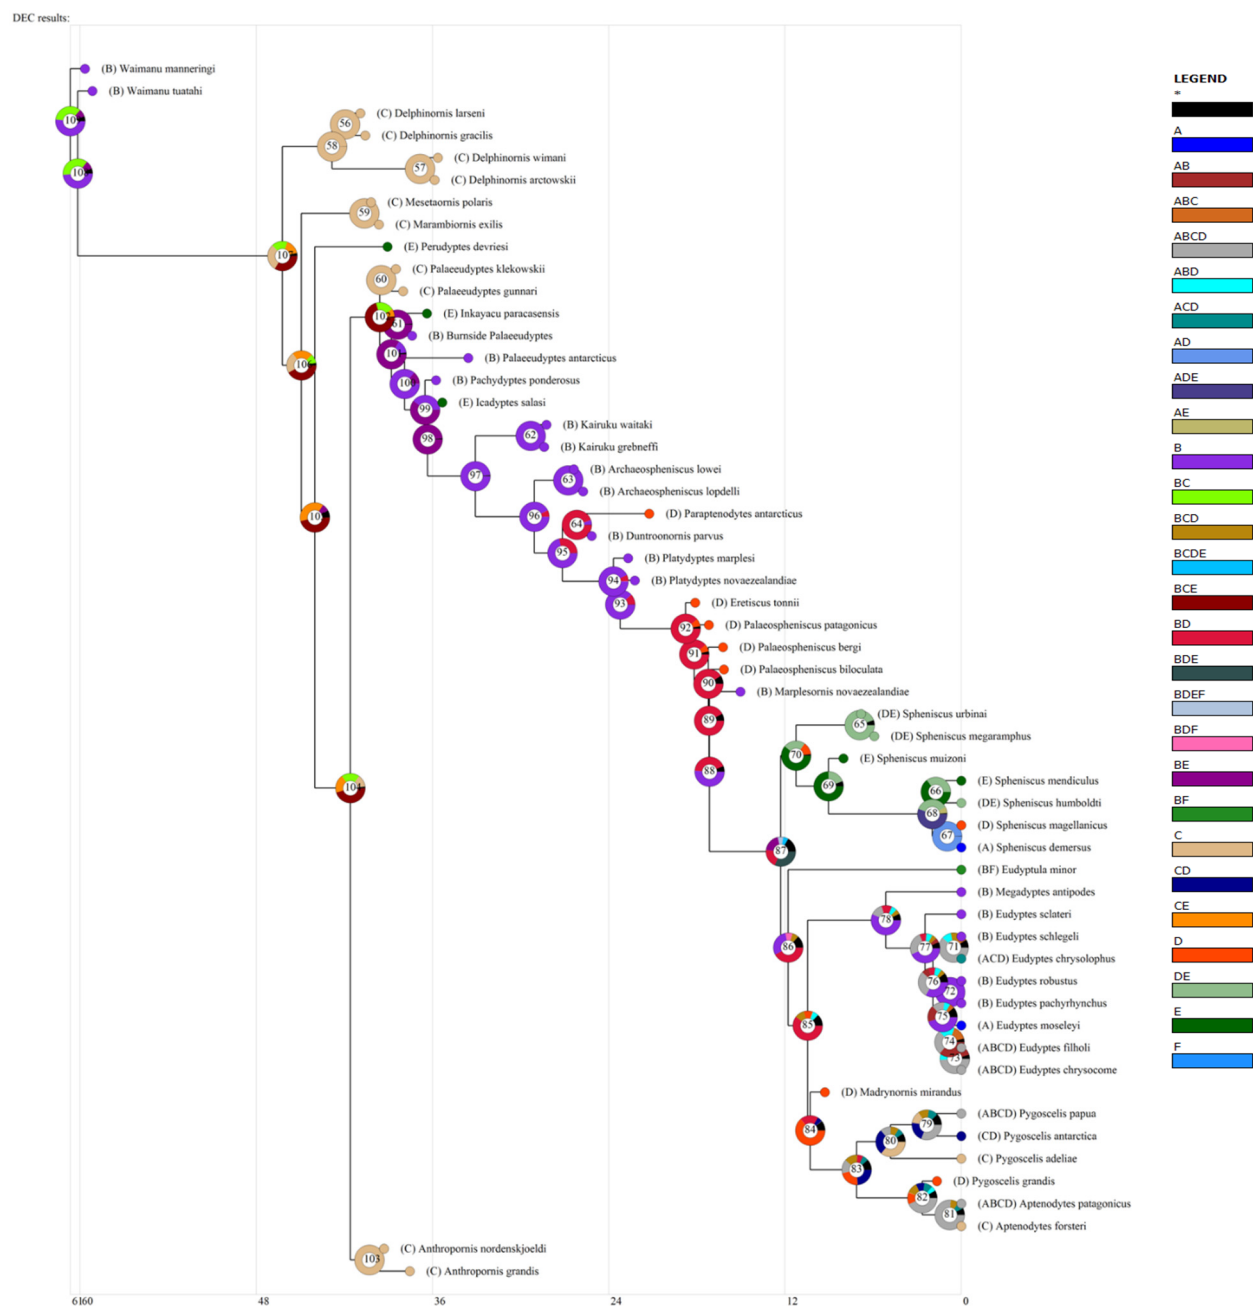

**Figure S1.** Biogeographical results of BioGeoBEARS under DEC model. Areas: A: Africa. B: New Zealand. C: Antarctica. D: Southern South America. E: Central South America. F: Australia. \*No area estimated.

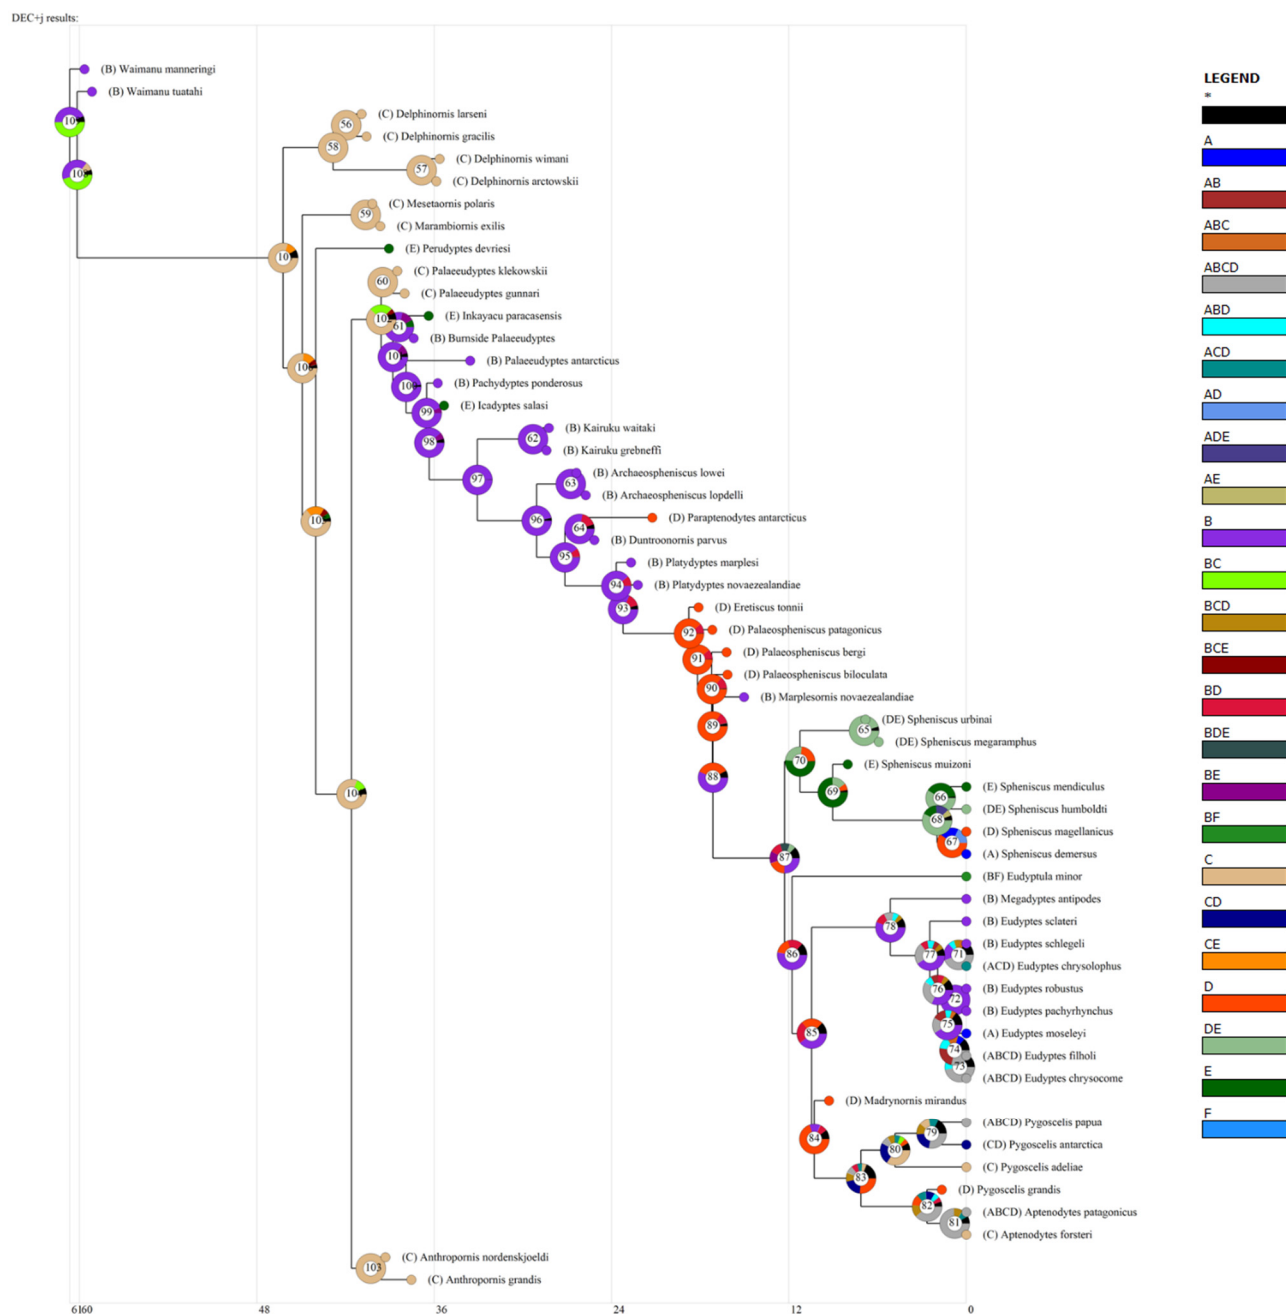

**Figure S2.** Biogeographical results of BioGeoBEARS under DEC+J model. Areas: A: Africa. B: New Zealand. C: Antarctica. D: Southern South America. E: Central South America. F: Australia. \*No area estimated.

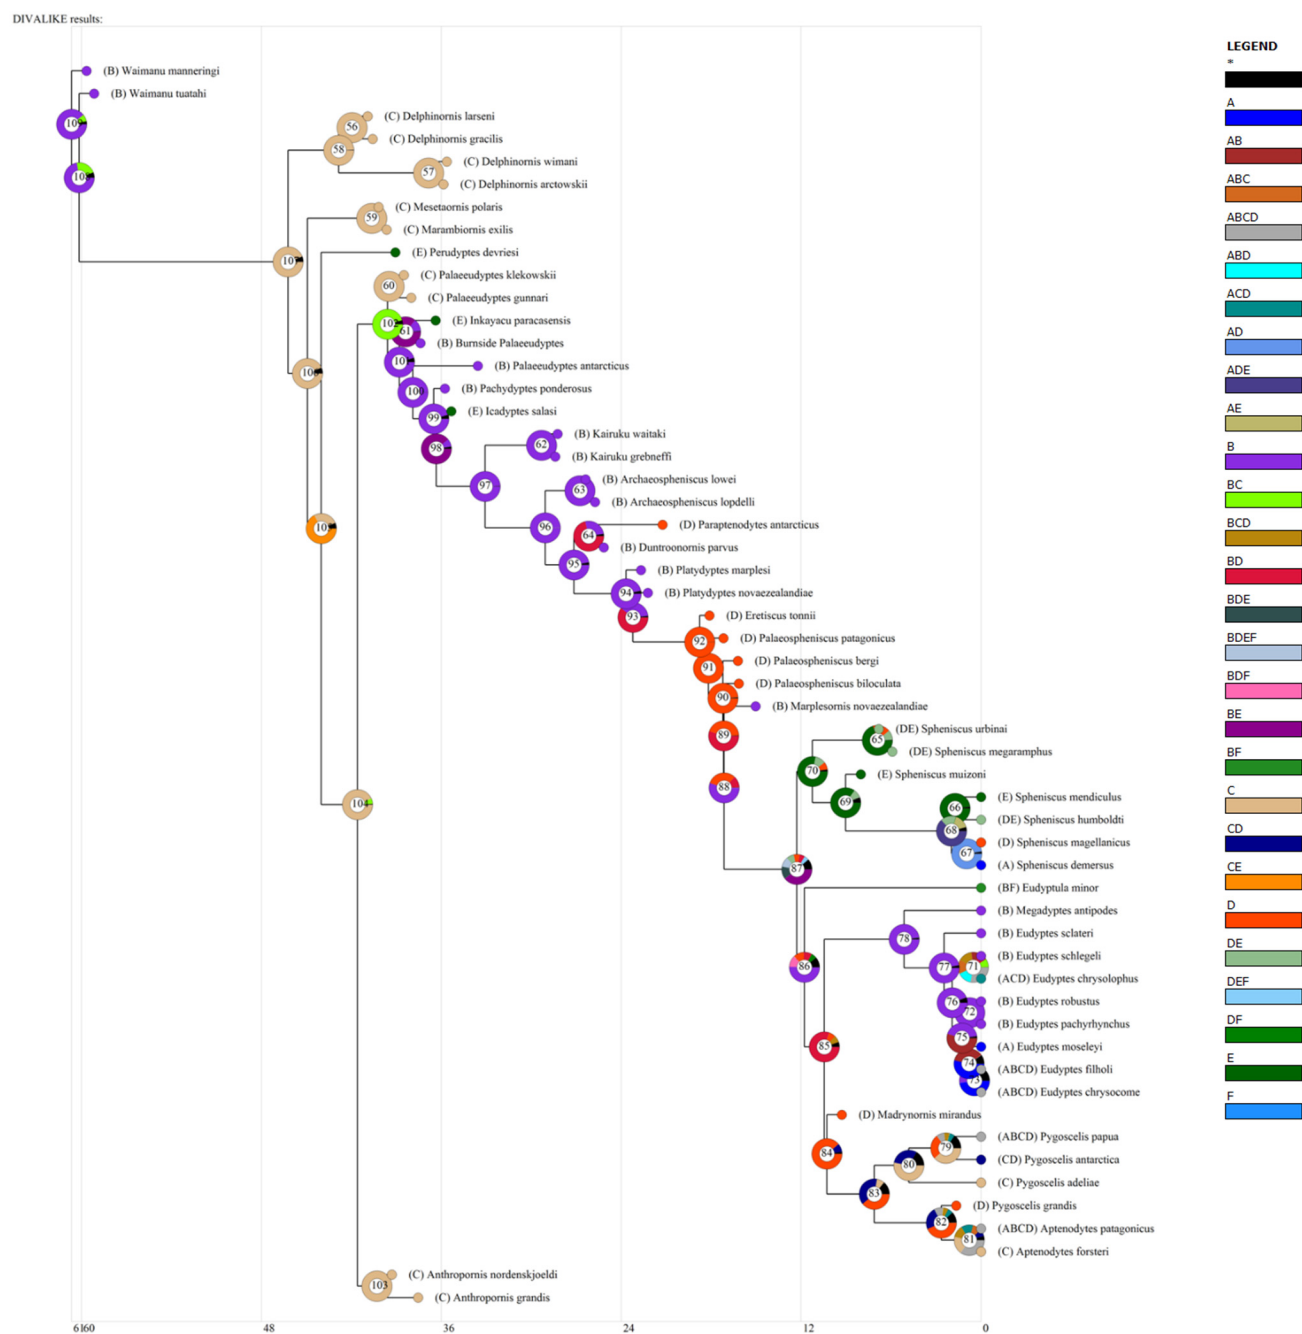

**Figure S3.** Biogeographical results of BioGeoBEARS under DIVALIKE model. Areas: A: Africa. B: New Zealand. C: Antarctica. D: South of South America. E: Central South America. F: Australia. \*No area estimated.

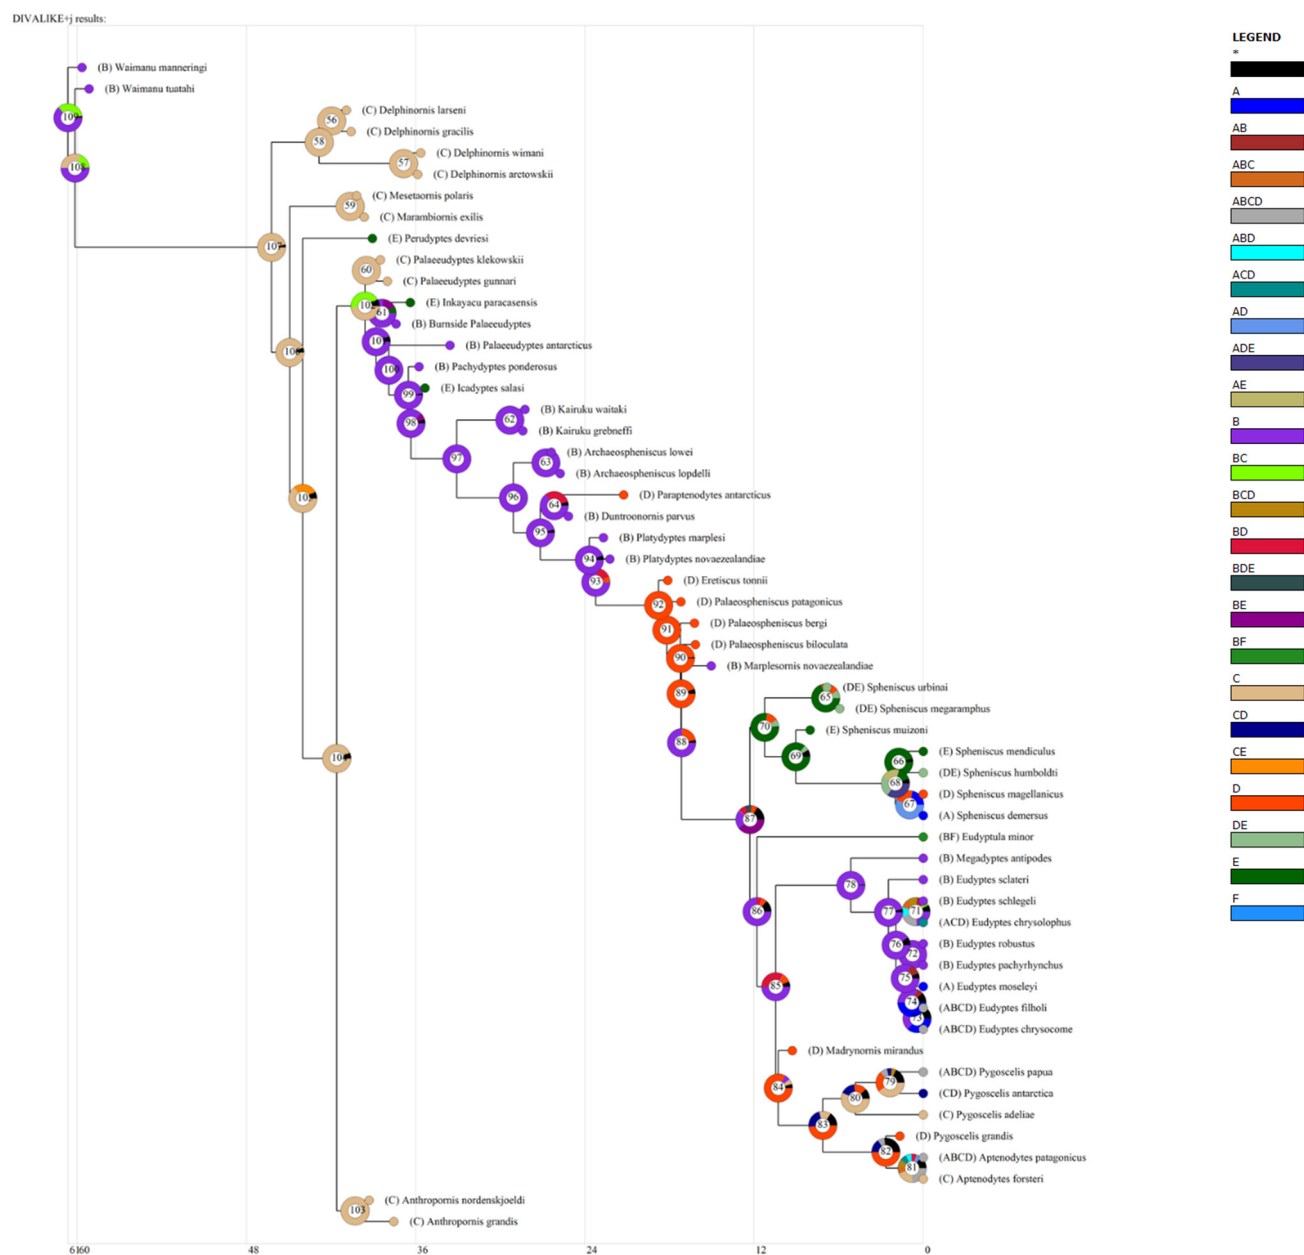

**Figure S4.** Biogeographical results of BioGeoBEARS under DIVALIKE+J model. Areas: A: Africa. B: New Zealand. C: Antarctica. D: South of South America. E: Central South America. F: Australia. \*No area estimated.

BAYAREALIKE results:

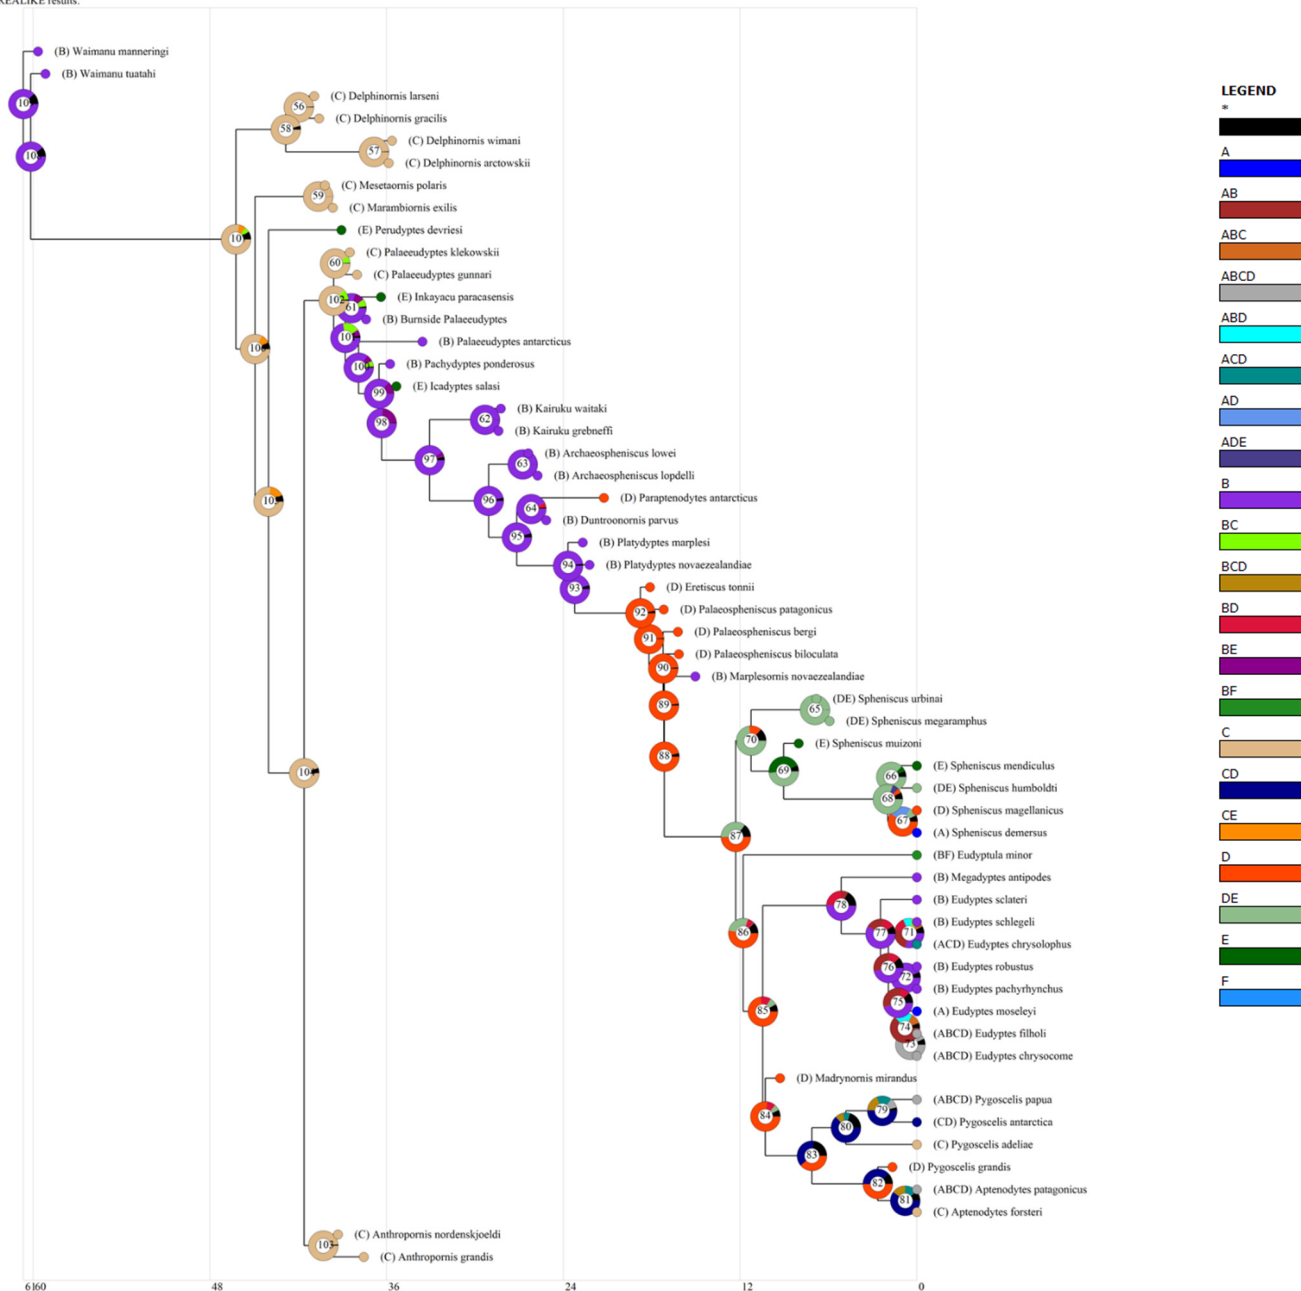

**Figure S5.** Biogeographical results of BioGeoBEARS under **BAYAREALIKE** model. Areas: A: Africa. B: New Zealand. C: Antarctica. D: South of South America. E: Central South America. F: Australia. \*No area estimated.

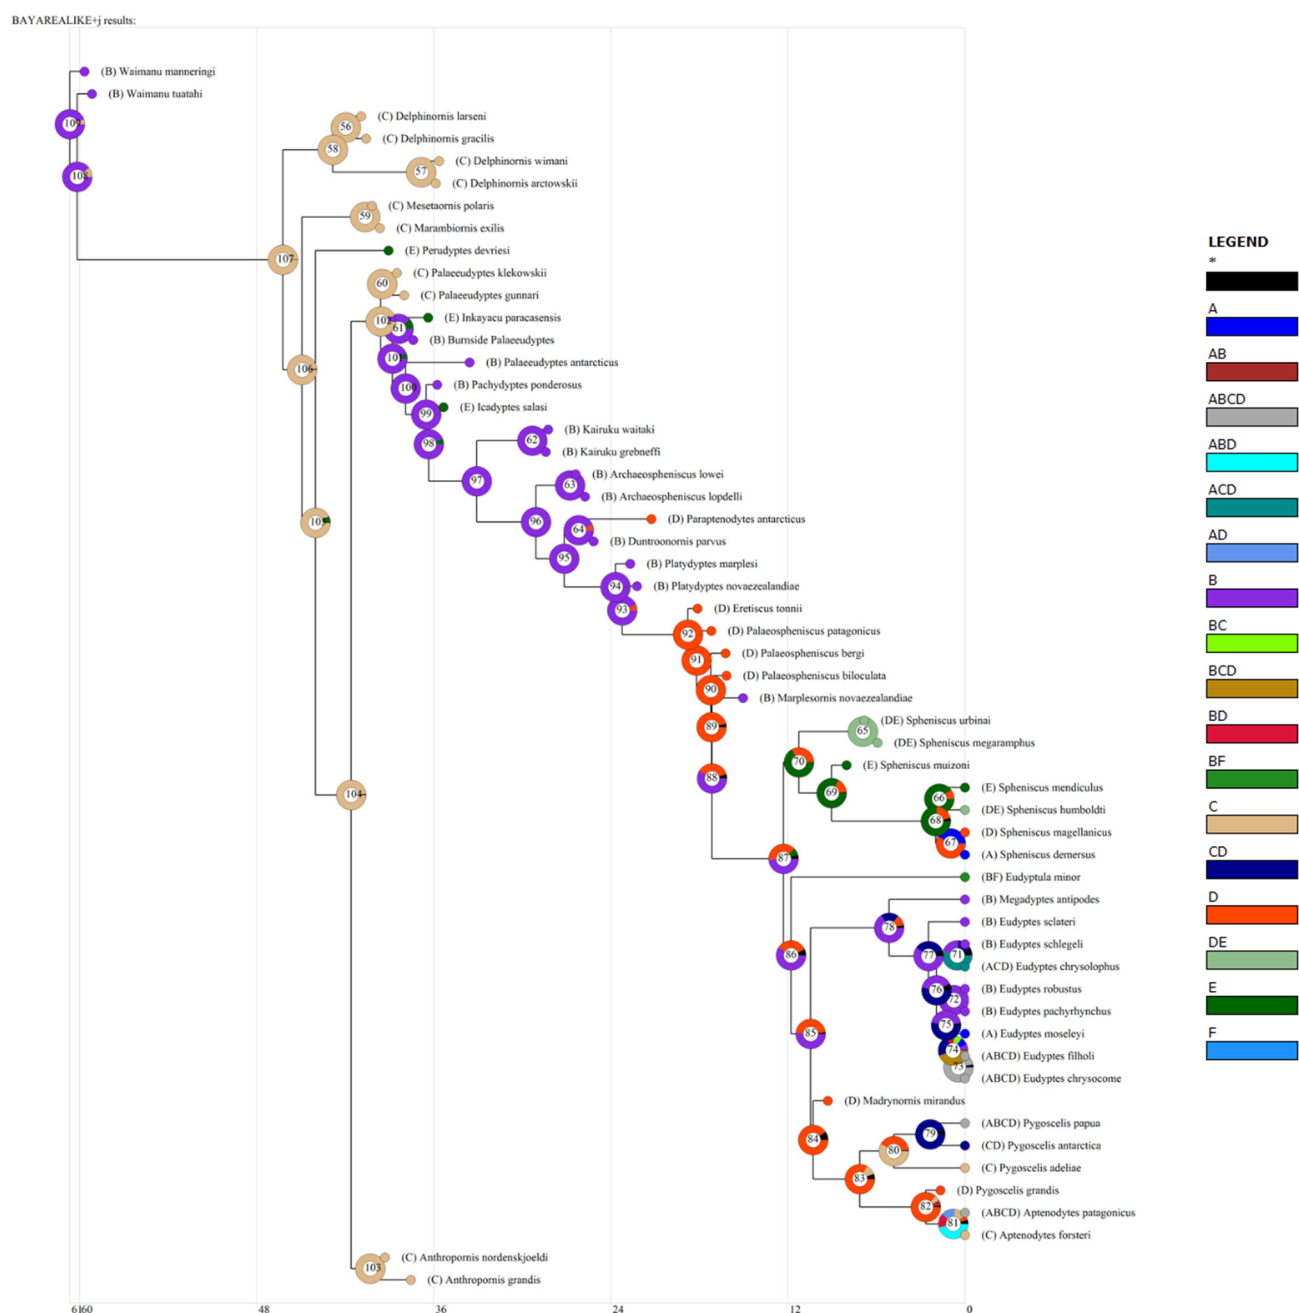

**Figure S6.** Biogeographical results of BioGeoBEARS under **BAYAREALIKE+J** model (the better model according to AIC value). Areas: A: Africa. B: New Zealand. C: Antarctica. D: South of South America. E: Central South America. F: Australia. \*No area estimated.

## Supplementary Material 2. Complementary statistical information

**Table S1.** Results of model test with statistical support of BioGeoBEARS analyses for all models (in blue the best model).

| Model         | LnL    | numparams | d     | e                     | j     | AICc  | AICc_wt               |
|---------------|--------|-----------|-------|-----------------------|-------|-------|-----------------------|
| DEC           | -139.9 | 2         | 0.026 | 0.0011                | 0     | 284   | $2.6 \times 10^{-6}$  |
| DEC+J         | -133   | 3         | 0.021 | $1.0 \times 10^{-12}$ | 0.033 | 272.5 | $8 \times 10^{-4}$    |
| DIVALIKE      | -151.4 | 2         | 0.035 | 0.017                 | 0     | 307.1 | $2.5 \times 10^{-11}$ |
| DIVALIKE+J    | -143.7 | 3         | 0.025 | $9.9 \times 10^{-9}$  | 0.030 | 294   | $1.8 \times 10^{-8}$  |
| BAYAREALIKE   | -150.2 | 2         | 0.027 | 0.12                  | 0     | 304.6 | $8.9 \times 10^{-11}$ |
| BAYAREALIKE+J | -125.9 | 3         | 0.013 | $1.0 \times 10^{-7}$  | 0.055 | 258.3 | 1.00                  |

Note: Use the highest AICc\_wt to select the best model

**Table S2.** Complementary results of model test with statistical support of BioGeoBEARS analyses comparing all models according to +J parameter.

| Alternative (A) | Null (N)    | LnLA   | LnLN   | DFA | DFN | DF | Dstatistic | p-value               | test        | tail       | AIC1  | AIC2  | AICwt1 | AICwt2                |
|-----------------|-------------|--------|--------|-----|-----|----|------------|-----------------------|-------------|------------|-------|-------|--------|-----------------------|
| DEC+J           | DEC         | -133   | -139.9 | 3   | 2   | 1  | 13.73      | 0.0002                | chi-squared | one-tailed | 272   | 283.8 | 1.00   | 0.0028                |
| DIVALIKE+J      | DIVALIKE    | -143.7 | -151.4 | 3   | 2   | 1  | 15.38      | $8.8 \times 10^{-5}$  | chi-squared | one-tailed | 293.5 | 306.9 | 1.00   | 0.0012                |
| BAYAREALIKE+J   | BAYAREALIKE | -125.9 | -150.2 | 3   | 2   | 1  | 48.51      | $3.3 \times 10^{-12}$ | chi-squared | one-tailed | 257.8 | 304.3 | 1.00   | $7.9 \times 10^{-11}$ |

Note: The  $p$ -value of the LRT (Likelihood Ratio Test) tells you whether or not you can reject the null hypothesis that without J and +J confer equal likelihoods on the data.
